# Supplementary material for: Transcriptomics in Toxicogenomics, Part II: Preprocessing and Differential Expression Analysis for High Quality Data
Source: MDPI journal article supplement (doi:10.3390/nano10050903), 2020-05-08
Supplement: s1 [file s1]

# CRAN and Bioconductor packages for Microarray data analysis

| Analysis Step                             | Agilent 2-color                                                                                            | Agilent 1-color                                                                                            | Affymetrix                    | Illumina Methylation                                                                                                                                                     |
|-------------------------------------------|------------------------------------------------------------------------------------------------------------|------------------------------------------------------------------------------------------------------------|-------------------------------|--------------------------------------------------------------------------------------------------------------------------------------------------------------------------|
| Raw Data                                  | limma::read.maimages                                                                                       | limma::read.maimages                                                                                       | affy::justRMA                 | minfi::read.metharray.exp                                                                                                                                                |
| QC                                        | arrayQualityMetrics::arrayQualityMetrics                                                                   | arrayQualityMetrics::arrayQualityMetrics                                                                   | yaqcaffy::yaqc                | shinyMethyl                                                                                                                                                              |
| Probe Quality Estimation                  | Custom function(); by using signal distribution of negative control probes                                 | Custom function(); by using signal distribution of negative control probes                                 | NA                            | minfi::detectionP                                                                                                                                                        |
| Sample and/or Array Variation Diagnostics | limma::plotDensities, limma::plotMD, boxplot                                                               | limma::plotDensities, boxplot                                                                              | limma::plotDensities, boxplot | minfi::densityPlot, boxplot                                                                                                                                              |
| Normalization                             | limma::normalizeBetweenArrays, limma::normalizeQuantiles, limma::normalizeVSN, limma::normalizeCyclicLoess | limma::normalizeQuantiles, limma::normalizeVSN, limma::normalizeCyclicLoess, limma::normalizeBetweenArrays | Handled by justRMA (Raw Data) | minfi::preprocessRaw, minfi::preprocessSWAN, minfi::preprocessRaw, minfi::preprocessQuantile, minfi::preprocessIllumina, minfi::preprocessFunnorm, minfi::preprocessNoob |

| Analysis Step           |         | Agilent 2-color                                                                                                                                                                         | Agilent 1-color                                                                                                                                                                         | Affymetrix                                                                                                                                                                              | Illumina Methylation                                                                                                                                                                    |
|-------------------------|---------|-----------------------------------------------------------------------------------------------------------------------------------------------------------------------------------------|-----------------------------------------------------------------------------------------------------------------------------------------------------------------------------------------|-----------------------------------------------------------------------------------------------------------------------------------------------------------------------------------------|-----------------------------------------------------------------------------------------------------------------------------------------------------------------------------------------|
| Batch Effect Estimation |         | swamp::confounding, swamp::prince, swamp::prince.plot, limma:::plotMDS                                                                                                                  |
| Batch Effect Mitigation | Known   | Custom function(); employs sva::ComBat to iteratively isolate and correct each batch                                                                                                    | Custom function(); employs sva::ComBat to iteratively isolate and correct each batch                                                                                                    | Custom function(); employs sva::ComBat to iteratively isolate and correct each batch                                                                                                    | Custom function(); employs sva::ComBat to iteratively isolate and correct each batch                                                                                                    |
|                         | Unknown | 1. sva::sva for identification of unknown sources of variation; 2. Estimation of surrogate variable effect via diagnostic plots; 3. Batch surrogate variables correction by sva::ComBat | 1. sva::sva for identification of unknown sources of variation; 2. Estimation of surrogate variable effect via diagnostic plots; 3. Batch surrogate variables correction by sva::ComBat | 1. sva::sva for identification of unknown sources of variation; 2. Estimation of surrogate variable effect via diagnostic plots; 3. Batch surrogate variables correction by sva::ComBat | 1. sva::sva for identification of unknown sources of variation; 2. Estimation of surrogate variable effect via diagnostic plots; 3. Batch surrogate variables correction by sva::ComBat |

| Analysis Step         | Agilent 2-color                                                                                                                                                                                                                                                                             | Agilent 1-color                                                                                                                                                                                                                                                                             | Affymetrix                                                                                                                                                                                                                                                                                  | Illumina Methylation                                                                                                                                                                                                                                                                        |
|-----------------------|---------------------------------------------------------------------------------------------------------------------------------------------------------------------------------------------------------------------------------------------------------------------------------------------|---------------------------------------------------------------------------------------------------------------------------------------------------------------------------------------------------------------------------------------------------------------------------------------------|---------------------------------------------------------------------------------------------------------------------------------------------------------------------------------------------------------------------------------------------------------------------------------------------|---------------------------------------------------------------------------------------------------------------------------------------------------------------------------------------------------------------------------------------------------------------------------------------------|
| Annotation            | Array design specific annotation from eArray OR intrinsic annotation from raw data                                                                                                                                                                                                          | Array design specific annotation from eArray OR intrinsic annotation from raw data                                                                                                                                                                                                          | Array design specific annotation from brainarray; Installable from user interface                                                                                                                                                                                                           | IlluminaHumanMethylation450kanno.ilmn12.hg19, IlluminaHumanMethylationEPICanno.ilm10b2.hg19 (from Bioconductor)                                                                                                                                                                             |
| Differential Analysis | limma::makeContrasts, limma::lmFit, limma::eBayes, limma::topTable                                                                                                                                                                                                                          |
| Data Exploration      | 1. Differential sets intersection VennDiagram::venn.diagram, UpSetR::upset; 2. Volcano plot via ggplot2::ggplot; 3. Expression values inspection via multi-gene/multi-probe, multi-sample/group facteted ggplot2::ggplot; 4. Highly differential gene set heatmap via made4::made4::heatmap | 1. Differential sets intersection VennDiagram::venn.diagram, UpSetR::upset; 2. Volcano plot via ggplot2::ggplot; 3. Expression values inspection via multi-gene/multi-probe, multi-sample/group facteted ggplot2::ggplot; 4. Highly differential gene set heatmap via made4::made4::heatmap | 1. Differential sets intersection VennDiagram::venn.diagram, UpSetR::upset; 2. Volcano plot via ggplot2::ggplot; 3. Expression values inspection via multi-gene/multi-probe, multi-sample/group facteted ggplot2::ggplot; 4. Highly differential gene set heatmap via made4::made4::heatmap | 1. Differential sets intersection VennDiagram::venn.diagram, UpSetR::upset; 2. Volcano plot via ggplot2::ggplot; 3. Expression values inspection via multi-gene/multi-probe, multi-sample/group facteted ggplot2::ggplot; 4. Highly differential gene set heatmap via made4::made4::heatmap |
