# Supplementary material for: Transcriptomics in Toxicogenomics, Part II: Preprocessing and Differential Expression Analysis for High Quality Data
Source: MDPI journal article supplement (doi:10.3390/nano10050903), 2020-05-08
Supplement: s1 [file s1]

## Diagnostic methods for microarrays quality check

| Category                                 | Plot                               | R/Bioconductor Packages |
|------------------------------------------|------------------------------------|-------------------------|
| Sample Quality                           | Sample prep controls               | simpleaffy              |
|                                          | 3'/5' for b'actin and GAPDH        | simpleaffy              |
|                                          | RNA degradation plot               | affy                    |
| Hybridization and overall signal quality | Spike-in hybrid controls           | simpleaffy              |
|                                          | Background intensity               | simpleaffy              |
|                                          | Percentage present                 | simpleaffy              |
|                                          | Preset/Marg./Absent calls          | simpleaffy              |
|                                          | Pos/Neg control distribution       | AffyQCReport            |
|                                          | All affymetrix controls            | affy, ArrayTools        |
|                                          |                                    |                         |
| Signal comparability and bias diagnostic | Scale factors                      | simpleaffy              |
|                                          | Boxplot of log-intensity           | affy                    |
|                                          | Density histogram                  | affy                    |
|                                          | MA plot                            | affy                    |
|                                          | Array reference layout             | affy                    |
|                                          | Pos/Neg controls COI plot          | affyQCReport            |
|                                          | 2D images                          | affy, affyPLM           |
|                                          | NUSE plot                          | affyPLM                 |
|                                          | RLE plot                           | affyPLM                 |
|                                          |                                    |                         |
|                                          |                                    |                         |
| Array correlation                        | Correlation plot                   | affy, gplots            |
|                                          | Hierarchical clustering dendrogram | affy, bioDist           |
|                                          | PCA plot                           | affy                    |
| Summary                                  | Summary table                      | simpleaffy              |
