# Supplementary material for: Transcriptomics in Toxicogenomics, Part II: Preprocessing and Differential Expression Analysis for High Quality Data
Source: MDPI journal article supplement (doi:10.3390/nano10050903), 2020-05-08
Supplement: s1 [file s1]

| Analysis Step               | RNASeq Tools                                                                     |
|-----------------------------|----------------------------------------------------------------------------------|
| Quality Check               | FastQC (Standalone)                                                              |
| Alignment                   | TopHat2 (bash)<br>Hisat2 (bash)                                                  |
| Read counts                 | HTSeq (Python),<br>Rsubread::featureCounts (R)                                   |
| Normalization and filtering | Noiseq::UQUA (R),<br>Noiseq::RPKM (R)                                            |
| Diagnostic plots            | Boxplot<br>PCA<br>MDS                                                            |
| Batch effect estimation     | swamp::confounding,<br>swamp::prince,<br>swamp::prince.plot,<br>limma::plotMDS   |
| Batch effect mitigation     | sva::ComBat<br>RUVSeq::RUVg - RUVs - RUVr                                        |
| Differential Expression     | edgeR::exactTest<br>edgeR::glmFit<br>Deseq2::DESeq<br>NOISeq::noiseq - noiseqbio |
